# Supplementary material
Source: PubMed Central journal article supplement (PMC1691151)
Supplement: 12427315s01.pdf [file 12427315s01.pdf]

These are electronic appendices to the paper by Johnson 2002 Determinants of loss of mammal species during the Late Quaternary ‘megafauna’ extinctions: life history and ecology, but not body size. *Proc. R. Soc. Lond. B* **269**, 2221—2227.

Electronic appendices are refereed with the text. However, no attempt has been made to impose a uniform editorial style on the electronic appendices.

**Table S1: Species used in analysis for Table 1, Fig 1 and Fig 2.**

|                      | Species                       | status<br>(0=extinct) | mass (gm) | reproductive<br>rate<br>(observed) | reproductive<br>rate<br>(derived) |
|----------------------|-------------------------------|-----------------------|-----------|------------------------------------|-----------------------------------|
| Ursidae              | <i>U. spelaeus</i>            | 0                     | 500000    | .                                  | 0.61                              |
|                      | <i>Tremarctos floridanus</i>  | 0                     | 280000    | .                                  | 0.96                              |
|                      | <i>Arctodus simus</i>         | 0                     | 500000    | .                                  | 0.61                              |
|                      | <i>A. pristinus</i>           | 0                     | 300000    | .                                  | 0.92                              |
|                      | <i>Ursus thibetanus</i>       | 1                     | 100000    | 1.7                                |                                   |
|                      | <i>U. americanus</i>          | 1                     | 180000    | 1.18                               |                                   |
|                      | <i>U. arctos</i>              | 1                     | 400000    | 0.86                               |                                   |
|                      | <i>U. maritimus</i>           | 1                     | 388000    | 0.67                               |                                   |
|                      | <i>Tremarctos ornatus</i>     | 1                     | 100000    | 1.5                                |                                   |
| Felidae              | <i>Homotherium latidens</i>   | 0                     | 150000    |                                    | 0.59                              |
|                      | <i>H. serum</i>               | 0                     | 150000    |                                    | 0.59                              |
|                      | <i>Panthera leo</i>           | 0                     | 200000    |                                    | 0.37                              |
|                      | <i>P. pardus</i>              | 0                     | 90000     |                                    | 0.97                              |
|                      | <i>Smilodon fatalis</i>       | 0                     | 150000    |                                    | 0.59                              |
|                      | <i>S. populators</i>          | 0                     | 150000    |                                    | 0.59                              |
|                      | <i>F. silvestris</i>          | 1                     | 5000      | 3.72                               |                                   |
|                      | <i>F. pardina</i>             | 1                     | 10000     | 2.5                                |                                   |
|                      | <i>F. lynx</i>                | 1                     | 19500     | 2.26                               |                                   |
|                      | <i>F. rufus</i>               | 1                     | 10000     | 2.87                               |                                   |
|                      | <i>F. geoffroyi</i>           | 1                     | 4000      | 2.57                               |                                   |
|                      | <i>F. pardalis</i>            | 1                     | 13000     | 1.64                               |                                   |
|                      | <i>F. yagouaroundi</i>        | 1                     | 7000      | 3.6                                |                                   |
|                      | <i>F. concolor</i>            | 1                     | 75000     | 1.07                               |                                   |
| <i>Panthera onca</i> | 1                             | 100000                | 0.96      |                                    |                                   |
| Bovidae              | <i>Bison priscus</i>          | 0                     | 1000000   | .                                  | 0.62                              |
|                      | <i>B. latifrons</i>           | 0                     | 900000    | .                                  | 0.64                              |
|                      | <i>Euceratherium collinum</i> | 0                     | 499000    | .                                  | 0.76                              |
|                      | <i>Bootherium bombifrons</i>  | 0                     | 753000    | .                                  | 0.68                              |
|                      | <i>Symbos cavifrons</i>       | 0                     | 400000    | .                                  | 0.81                              |
|                      | <i>Oreamnos harringtoni</i>   | 0                     | 45000     | .                                  | 1.27                              |
|                      | <i>Spirocerus kiakhtensis</i> | 0                     | 790000    | .                                  | 0.67                              |
|                      | <i>Bison bonasus</i>          | 1                     | 900000    | 0.57                               |                                   |
|                      | <i>Bison bison</i>            | 1                     | 630000    | 0.81                               |                                   |
|                      | <i>Saiga tartarica</i>        | 1                     | 43000     | 1.68                               |                                   |
|                      | <i>Nemorhaedus goral</i>      | 1                     | 35000     | 1                                  |                                   |
|                      | <i>Oreamnos americanus</i>    | 1                     | 90000     | 1.4                                |                                   |
|                      | <i>Rupicapra rupicapra</i>    | 1                     | 40000     | 1                                  |                                   |
|                      | <i>Ovibos moschatus</i>       | 1                     | 310000    | 0.62                               |                                   |
|                      | <i>Capra aegagrus</i>         | 1                     | 60000     | 1.72                               |                                   |
|                      | <i>Capra ibex</i>             | 1                     | 92000     | 0.86                               |                                   |
|                      | <i>C. caucasica</i>           | 1                     | 55000     | 1.08                               |                                   |

|          |                                   |   |        |      |          |
|----------|-----------------------------------|---|--------|------|----------|
|          | <i>C. cylindricornis</i>          | 1 | 75000  | 1.2  |          |
|          | <i>Ovis ammon</i>                 | 1 | 38000  | 1.2  |          |
|          | <i>Ovis canadensis</i>            | 1 | 91000  | 1.36 |          |
|          | <i>Ovis dalli</i>                 | 1 | 74000  | 1.1  |          |
|          | <i>Ovis orientalis</i>            | 1 | 32000  | 1.09 |          |
|          | <i>Gazella subgutturosa</i>       | 1 | 36000  | 1.53 |          |
|          | <i>Procarpa gutturosa</i>         | 1 | 34000  | 1.33 |          |
| Cervidae | <i>Navahoceros fricki</i>         | 0 | 222600 |      | 1.16     |
|          | <i>Cervalces scotti</i>           | 0 | 485600 |      | 1.06     |
|          | <i>Megaloceros giganteus</i>      | 0 | 700000 |      | 1.01     |
|          | <i>Sangamona fugitiva</i>         | 0 | 158000 |      | 1.2      |
|          | <i>Dama dama</i>                  | 1 | 70000  | 1    |          |
|          | <i>Cervus elaphus</i>             | 1 | 240000 | 1    |          |
|          | <i>Cervus 'wapiti'</i>            | 1 | 500000 | 1    |          |
|          | <i>Cervus nippon</i>              | 1 | 48000  | 1.05 |          |
|          | <i>Odocoileus hemionus</i>        | 1 | 112000 | 1.67 |          |
|          | <i>O. virginianus</i>             | 1 | 80000  | 1.69 |          |
|          | <i>Alces alces</i>                | 1 | 410000 | 1.26 |          |
|          | <i>Rangifer tarandus</i>          | 1 | 165000 | 1    |          |
|          | <i>Capreolus capreolus</i>        | 1 | 32000  | 1.92 |          |
|          | <i>Blastoceros dichotomus</i>     | 1 | 109000 | 1    |          |
|          | <i>Ozotoceros bezoarticus</i>     | 1 | 32000  | 1.11 |          |
|          | <i>H. bisulcus</i>                | 1 | 70000  |      |          |
|          | <i>Mazama americana</i>           | 1 | 29000  | 1.5  |          |
|          | <i>M. gouazoubira</i>             | 1 | 16300  |      |          |
|          | <i>M. rufina</i>                  | 1 | 8200   |      |          |
|          | <i>P. pudu</i>                    | 1 | 10000  | 1.5  |          |
| Lemurs   | <i>Pachylemur insignis</i>        | 0 | 10000  |      | 0.842759 |
|          | <i>P. jullyi</i>                  | 0 | 12500  |      | 0.79632  |
|          | <i>Megaladapis grandidieri</i>    | 0 | 65000  |      | 0.453212 |
|          | <i>M. madagascariensis</i>        | 0 | 40000  |      | 0.554253 |
|          | <i>M. edwardsi</i>                | 0 | 75000  |      | 0.423431 |
|          | <i>Archeolemur edwardsi</i>       | 0 | 22000  |      | 0.678671 |
|          | <i>A. majori</i>                  | 0 | 17000  |      | 0.732328 |
|          | <i>Hadropithecus stenognathus</i> | 0 | 28000  |      | 0.628482 |
|          | <i>Mesopropithecus globiceps</i>  | 0 | 10000  |      | 0.842759 |
|          | <i>M. pithecoides</i>             | 0 | 11000  |      | 0.822924 |
|          | <i>M. dolichobrachion</i>         | 0 | 12000  |      | 0.804815 |
|          | <i>Babakotia radofilai</i>        | 0 | 15000  |      | 0.758376 |
|          | <i>Palaepropithecus ingens</i>    | 0 | 45000  |      | 0.529741 |
|          | <i>P. maximus</i>                 | 0 | 55000  |      | 0.487978 |
|          | <i>Archaeoindris fontoynontii</i> | 0 | 200000 |      | 0.219308 |
|          | <i>D. robusta</i>                 | 0 | 50000  |      | 0.507814 |
|          | <i>Hapalemur griseus</i>          | 1 | 850    | 1.25 |          |
|          | <i>Lemur catta</i>                | 1 | 2900   | 1.17 |          |
|          | <i>Eulemur fulvus</i>             | 1 | 3050   | 1.2  |          |
|          | <i>E. macaco</i>                  | 1 | 2450   | 1.15 |          |
|          | <i>E. coronatus</i>               | 1 | 2000   | 1.4  |          |
|          | <i>E. mongoz</i>                  | 1 | 2100   | 1.12 |          |
|          | <i>Varecia variegata</i>          | 1 | 3900   | 2    |          |
|          | <i>Lepilemur mustelinus</i>       | 1 | 1000   |      |          |
|          | <i>L. leucopus</i>                | 1 | 700    |      |          |
|          | <i>Avahi laniger</i>              | 1 | 1000   |      |          |
|          | <i>Propithecus verreauxi</i>      | 1 | 5250   | 1    |          |
|          | <i>Indri indri</i>                | 1 | 6750   | 0.4  |          |

|              |                             |   |          |      |      |
|--------------|-----------------------------|---|----------|------|------|
|              | Daubentonia                 | 1 | 2600     | 0.4  |      |
|              | madagascariensis            |   |          |      |      |
| Macropodidae | Procoptodon goliath         | 0 | 250000 . |      | 0.44 |
|              | P. rapha                    | 0 | 150000 . |      | 0.63 |
|              | P. pusio                    | 0 | 75000 .  |      | 0.89 |
|              | P. texasensis               | 0 | 150000 . |      | 0.63 |
|              | Simosthenurus pales         | 0 | 150000 . |      | 0.63 |
|              | S. orientalis               | 0 | 75000 .  |      | 0.89 |
|              | S. occidentalis             | 0 | 50000 .  |      | 1.05 |
|              | S. brownei                  | 0 | 50000 .  |      | 1.05 |
|              | S. maddocki                 | 0 | 50000 .  |      | 1.05 |
|              | S. gilli                    | 0 | 30000 .  |      | 1.24 |
|              | Sthenurus stirlingi         | 0 | 150000 . |      | 0.63 |
|              | S. tindalei                 | 0 | 100000 . |      | 0.79 |
|              | S. atlas                    | 0 | 150000 . |      | 0.63 |
|              | S. oreas                    | 0 | 100000 . |      | 0.79 |
|              | S. andersoni                | 0 | 50000 .  |      | 1.05 |
|              | Kangurus congruus           | 0 | 40000 .  |      | 1.13 |
|              | Troposodon minor            | 0 | 40000 .  |      | 1.13 |
|              | Macropus pearsoni           | 0 | 150000 . |      | 0.63 |
|              | M. ferragus                 | 0 | 150000 . |      | 0.63 |
|              | M. thor                     | 0 | 30000 .  |      | 1.24 |
|              | M. piltonensis              | 0 | 30000 .  |      | 1.24 |
|              | Protemnodon anak            | 0 | 100000 . |      | 0.79 |
|              | P. roechus                  | 0 | 100000 . |      | 0.79 |
|              | P. brehus                   | 0 | 100000 . |      | 0.79 |
|              | P. hopei                    | 0 | 50000 .  |      | 1.05 |
|              | P. tumbuna                  | 0 | 50000 .  |      | 1.05 |
|              | P. nombe                    | 0 | 40000 .  |      | 1.13 |
|              | Bohra paulae                | 0 | 35000    |      | 1.18 |
|              | Dendrolagus bennettianus    | 1 | 10000    | 1    |      |
|              | D. Lumholtzi                | 1 | 6800     | 0.84 |      |
|              | Dorcopsis luctuosa          | 1 | 3600     | 1.91 |      |
|              | Lagorchestes conspicilattus | 1 | 3000     | 2.39 |      |
|              | L. hirsutus                 | 1 | 1280     | 2.92 |      |
|              | Lagostrophus fasciatus      | 1 | 1700     | 1    |      |
|              | Macropus agilis             | 1 | 15000    | 1.66 |      |
|              | M. antilopinus              | 1 | 27000    | 1.35 |      |
|              | M. dorsalis                 | 1 | 11000    | 1.73 |      |
|              | M. eugenii                  | 1 | 6500     | 1    |      |
|              | M. fuliginosus              | 1 | 40000    | 0.98 |      |
|              | M. giganteus                | 1 | 49000    | 1.00 |      |
|              | M. parma                    | 1 | 5400     | 1.71 |      |
|              | M. parryi                   | 1 | 13000    | 1.37 |      |
|              | M. robustus                 | 1 | 35000    | 1.38 |      |
|              | M. rufogriseus              | 1 | 17000    | 1.28 |      |
|              | M. rufus                    | 1 | 46000    | 1.51 |      |
|              | Onychogalea fraenata        | 1 | 6000     | 2.92 |      |
|              | Peradorcas concinna         | 1 | 1400     | 2.13 |      |
|              | Petrogale assimilis         | 1 | 4400     | 1.82 |      |
|              | P. inornata                 | 1 | 4600     | 1.74 |      |
|              | P. penicillata              | 1 | 7100     | 1.78 |      |
|              | P. persephone               | 1 | 6200     | 1.75 |      |
|              | P. xanthopus                | 1 | 9000     | 1.86 |      |
|              | Setonix brachyurus          | 1 | 3200     | 1    |      |
|              | Thylagale billardieri       | 1 | 5500     | 1.79 |      |

|             |                                  |   |        |      |      |
|-------------|----------------------------------|---|--------|------|------|
|             | <i>T. stigmatica</i>             | 1 | 4600   | 1.97 |      |
|             | <i>T. thetis</i>                 | 1 | 5900   | 2.00 |      |
|             | <i>Wallabia bicolor</i>          | 1 | 15000  | 1.43 |      |
| Tayassuidae | <i>Mylohyus nasutus</i>          | 0 | 86750  |      | 0.67 |
|             | <i>Platygonus compressus</i>     | 0 | 81250  |      | 0.73 |
|             | <i>Catagonus wagneri</i>         | 1 | 35000  | 2.46 |      |
|             | <i>Tayassu tajacu</i>            | 1 | 20000  | 4    |      |
|             | <i>Tayassu pecari</i>            | 1 | 33500  | 1.7  |      |
| Dasypodidae | <i>Holmesina septentrionalis</i> | 0 | 312000 |      |      |
|             | <i>Dasypus bellus</i>            | 0 | 45000  |      | 1.09 |
|             | <i>Kraglievichia</i>             | 0 | 45000  |      | 1.09 |
|             | <i>Chaetophractus villosus</i>   | 1 | 2400   | 1.62 |      |
|             | <i>Chaetophractus nationi</i>    | 1 | 1620   | 1.5  |      |
|             | <i>Dasypus hybridus</i>          | 1 | 1500   | 8    |      |
|             | <i>D. novemcinctus</i>           | 1 | 3900   | 4    |      |
|             | <i>D. kappleri</i>               | 1 | 9500   | 2    |      |
|             | <i>D. sabanicola</i>             | 1 | 1500   | 4    |      |
|             | <i>D. septemcinctus</i>          | 1 | 1630   | 6    |      |
|             | <i>Euphractus sexcinctus</i>     | 1 | 4315   | 1.5  |      |
|             | <i>Priodontes maximus</i>        | 1 | 26800  | 1.5  |      |
|             | <i>Tolypeutes matacus</i>        | 1 | 1100   | 1    |      |
|             | <i>Zaedyus pichiy</i>            | 1 | 1020   | 2    |      |
|             | <i>Cabassous centralis</i>       | 1 | 2750   | 1    |      |
| Vombatoidea | <i>Lasiorhinus angustidens</i>   | 0 | 50000  |      | 0.75 |
|             | <i>Phascolomys medius</i>        | 0 | 50000  |      | 0.75 |
|             | <i>Phascolonus gigas</i>         | 0 | 200000 |      | 0.59 |
|             | <i>Ramsaya magna</i>             | 0 | 100000 |      | 0.67 |
|             | <i>Vombatus hacketti</i>         | 0 | 30000  |      | 0.81 |
|             | <i>Warenja wakefieldi</i>        | 0 | 10000  |      | 0.94 |
|             | <i>L. latifrons</i>              | 1 | 26000  | 1    |      |
|             | <i>L. krefftii</i>               | 1 | 31000  | 0.65 |      |
|             | <i>V. ursinus</i>                | 1 | 26000  | 0.5  |      |
|             | <i>P. cinereus</i>               | 1 | 5100   | 1    |      |

**Table S2: Ecological traits of species from the regions covered by the analysis that went extinct in the Late Pleistocene.**

| Family               | Species                          | log10 mass (gm) | terrestrial 0, arboreal 1 | Habitat (0 = open, 1 =closed) |
|----------------------|----------------------------------|-----------------|---------------------------|-------------------------------|
| Mustelidae           | Brachyprotoma                    | 2.30103         | 0                         | 1                             |
|                      | Martes nobilis                   | .               | 0                         |                               |
| Canidae              | Canis dirus                      | 4.60205999      | 0                         | 0                             |
|                      | Procyon                          | 4.30103         | 0                         |                               |
| Felidae              | Acinonyx trumani                 | .               | 0                         | 0                             |
|                      | Homotherium latidens             | 5.17609126      | 0                         |                               |
|                      | H. serum                         | 5.17609126      | 0                         | 0                             |
|                      | Panthera leo                     | 5.30103         | 0                         | 0                             |
|                      | P. pardus                        | 4.95424251      | 0                         |                               |
|                      | Smilodon fatalis                 | 5.17609126      | 0                         |                               |
|                      | S. populators                    | 5.17609126      | 0                         |                               |
| Hyaenidae            | Crocota crocuta                  | 4.84509804      | 0                         |                               |
|                      | Hyaena hyaena                    | 4.60205999      | 0                         |                               |
| Ursidae              | U. spelaeus                      | 5.69897         | 0                         |                               |
|                      | Tremarctos floridanus            | 5.447158        | 0                         |                               |
|                      | Arctodus simus                   | 5.69897         | 0                         |                               |
|                      | A. pristinus                     | 5.477121        | 0                         |                               |
| Castoridae           | Castoroides ohioensis            | 5.255273        | 0                         | 1                             |
|                      | Trogotherium                     | 4.39794001      | 0                         |                               |
| Myoxidae             | Leithia                          | 2.90308999      | 0                         |                               |
| Hydrochoeridae       | Nechoerus pinkneyi               | 5               | 0                         |                               |
|                      | Hydrochoerus holmesi             | .               |                           | 1                             |
| Macrauchenidae       | Macrauchenia                     | 5.69897         | 0                         |                               |
|                      | Windhausenia                     | .               | 0                         |                               |
| Toxodontidae         | Mixotoxodon                      | .               | 0                         |                               |
|                      | Toxodon                          | .               | 0                         |                               |
|                      | Mesotherium                      | .               | 0                         | 0                             |
| Equidae              | Equus                            | .               | 0                         | 0                             |
|                      | Hippidion                        | .               | 0                         |                               |
|                      | Onohippidium                     | .               | 0                         |                               |
| Tapiridae            | Tapirus veroensis                | 5.47712126      | 0                         | 1                             |
|                      | T. californicus                  | .               | 0                         | 1                             |
|                      | T. copei                         | .               | 0                         | 1                             |
| Rhinocerotidae       | Coelodonta                       | 6.4624          | 0                         | 0                             |
|                      | Elasmotherium                    | .               | 0                         | 0                             |
|                      | Dicerorhinus hemitoechus         | 6.2041          | 0                         | 0                             |
|                      | D. kirchbergensis                | 6.2041          | 0                         | 1                             |
| Plesiorycteropodidae | Plesiorycteropus madagascarensis | .               | 0                         | 1                             |
|                      | P. germainepetterae              | .               | 0                         | 1                             |
| Tayassuidae          | Mylohyus nasutus                 | 4.86628734      | 0                         | 0                             |
|                      | Platygonus compressus            | 4.7201593       | 0                         | 0                             |
| Hippopotamidae       | Hippopotamus amphibius           | 6.47712126      | 0                         | 0                             |
|                      | H. lemerlei                      | .               | 0                         |                               |

|                 |                            |            |   |   |
|-----------------|----------------------------|------------|---|---|
|                 | H. laloumena               |            | 0 |   |
|                 | H. madagascariensis        |            | 0 |   |
| Camelidae       | Camelops hesternus         | 5.763428   | 0 | 0 |
|                 | Hemiauchenia macrocephala  | 5          | 0 | 0 |
|                 | Paleolama mirifica         | 4.90309    | 0 | 1 |
|                 | Camelus knoblochi          | 5.740363   | 0 |   |
|                 | Titanotylopus              | .          | 0 |   |
| Bovidae         | Bison priscus              | 6          | 0 | 0 |
|                 | B. latifrons               | 5.954243   | 0 | 0 |
|                 | Euceratherium collinum     | 5.698101   | 0 |   |
|                 | Bootherium bombifrons      | 5.876795   | 0 |   |
|                 | Symbos cavifrons           | 5.60206    | 0 | 0 |
|                 | Oreamnos harringtoni       | 4.653213   | 0 | 1 |
|                 | Spirocerus kiakhtensis     | 5.897627   | 0 |   |
| Cervidae        | Navahoceros fricki         | 5.347525   | 0 | 1 |
|                 | Alces latifrons            | .          | 0 |   |
|                 | Cervalces scotti           | 5.686279   | 0 |   |
|                 | Megaloceros giganteus      | 5.845098   | 0 | 0 |
|                 | Sangamona fugitiva         | 5.198657   | 0 | 0 |
|                 | Choritoceros               | .          | 0 |   |
|                 | Morenelephas               | .          | 0 |   |
| Antilocapridae  | Capromeryx minor           | 4          | 0 | 0 |
|                 | Stockoceros                | 4.41497335 | 0 | 0 |
|                 | Tetrameryx                 | 4.65321251 | 0 | 0 |
| Mammutidae      | Mammut americanum          | .          | 0 | 1 |
| Gomphotheriidae | Cuvieronius                | .          | 0 |   |
|                 | Haplomastodon              | .          | 0 |   |
|                 | Stegomastodon              | .          | 0 | 0 |
| Elephantidae    | Mammuthus primigenius      | 6.69897    | 0 | 0 |
|                 | Mammuthus jeffersonii      | .          | 0 | 0 |
|                 | Palaeoloxodon antiquus     | 6.9542     | 0 | 1 |
| Lemurs          | Pachylemur insignis        | 4          | 1 | 1 |
|                 | P. jullyi                  | 4.09691    | 1 | 1 |
|                 | Megaladapis grandidieri    | 4.812913   | 1 | 1 |
|                 | M. madagascariensis        | 4.60206    | 1 | 1 |
|                 | M. edwardsi                | 4.875061   | 1 | 1 |
|                 | Archeolemur edwardsi       | 4.342423   | 0 | 1 |
|                 | A. majori                  | 4.230449   | 0 | 1 |
|                 | Hadropithecus stenognathus | 4.447158   | 0 | 1 |
|                 | Mesopropithecus globiceps  | 4          | 1 | 1 |
|                 | M. pithecoides             | 4.041393   | 1 | 1 |
|                 | M. dolichobrachion         | 4.079181   | 1 | 1 |
|                 | Babakotia radofilai        | 4.176091   | 1 | 1 |
|                 | Palaeopropithecus ingens   | 4.653213   | 1 | 1 |
|                 | P. maximus                 | 4.740363   | 1 | 1 |
|                 | Archaeoindris fontoynontii | 5.30103    | 0 | 1 |
|                 | D. robusta                 | 4.69897    | 1 | 1 |
| Potoroidae      | Propleopus oscillans       | 4.60205999 | 0 | 0 |
|                 | N. gen                     | 3.69897    | 0 |   |

|                 |                         |                       |            |   |   |
|-----------------|-------------------------|-----------------------|------------|---|---|
| Macropodidae    | Bohra paulae            | 4.54407               | 1          | 1 |   |
|                 | Procoptodon goliah      | 5.39794               | 0          | 0 |   |
|                 | P. rapha                | 5.176091              | 0          | 0 |   |
|                 | P. pusio                | 4.875061              | 0          | 0 |   |
|                 | P. texasensis           | 5.176091              | 0          | 0 |   |
|                 | Simosthenurus pales     | 5.176091              | 0          | 0 |   |
|                 | S. orientalis           | 4.875061              | 0          | 0 |   |
|                 | S. occidentalis         | 4.69897               | 0          | 0 |   |
|                 | S. brownei              | 4.69897               | 0          | 0 |   |
|                 | S. maddocki             | 4.69897               | 0          | 0 |   |
|                 | S. gilli                | 4.477121              | 0          | 0 |   |
|                 | Sthenurus stirlingi     | 5.176091              | 0          | 0 |   |
|                 | S. tindalei             | 5                     | 0          | 0 |   |
|                 | S. atlas                | 5.176091              | 0          | 0 |   |
|                 | S. oreas                | 5                     | 0          | 0 |   |
|                 | S. andersoni            | 4.69897               | 0          | 0 |   |
|                 | Kangurus congruus       | 4.60206               | 0          |   |   |
|                 | Troposodon minor        | 4.60206               | 0          |   |   |
|                 | Macropus pearsoni       | 5.176091              | 0          |   |   |
|                 | M. ferragus             | 5.176091              | 0          |   |   |
|                 | M. thor                 | 4.477121              | 0          |   |   |
|                 | M. piltonensis          | 4.477121              | 0          |   |   |
|                 | Protemnodon anak        | 5                     | 0          |   |   |
|                 | P. roechus              | 5                     | 0          |   |   |
|                 | P. brehus               | 5                     | 0          | 0 |   |
|                 | P. hopei                | 4.69897               | 0          |   |   |
|                 | P. tumbuna              | 4.69897               | 0          |   |   |
|                 | P. nombe                | 4.60206               | 0          |   |   |
|                 | Tachyglossidae          | Megalibgwilia ramsayi | 4          | 0 |   |
|                 |                         | Zaglossus hacketti    | 4.47712126 | 0 |   |
|                 | Diprotodontidae         | Diprotodon minor      | 5.95424251 | 0 | 0 |
|                 |                         | D. optatum            | 6          | 0 | 0 |
|                 | Euryzygoma dunense      | 5.69897               | 0          |   |   |
|                 | Euwenia grata           | 5.69897               | 0          |   |   |
|                 | Nototherium mitchelli   | 5.69897               | 0          | 0 |   |
|                 | Zygomaturus trilobus    | 5.69897               | 0          | 1 |   |
|                 | Kolopsis watutense      | 5.47712126            | 0          |   |   |
|                 | Hulitherium thomasettii | 5.17609126            | 0          |   |   |
|                 | Maokopia ronaldi        | 5                     | 0          |   |   |
| Palorchestidae  | Palorchestes azael      | 5.69897               | 0          | 1 |   |
|                 | P. parvus               | 5                     | 0          | 1 |   |
| Vombatidae      | Lasiorhinus angustidens | 4.69897               | 0          | 1 |   |
|                 | Phascolomys medius      | 4.69897               | 0          | 1 |   |
|                 | Phascolonus gigas       | 5.30103               | 0          |   |   |
|                 | Ramsaya magna           | 5                     | 0          | 1 |   |
|                 | Vombatus hacketti       | 4.477121              | 0          | 1 |   |
|                 | Warenja wakefieldi      | 4                     | 0          | 1 |   |
| Thylacoleonidae | Thylacaleo carnifex     | 5.30103               | 0          | 0 |   |
| Megalonychidae  | Megalonyx jeffersonii   | 5.778151              | 0          | 1 |   |

|                |                                  |          |   |   |
|----------------|----------------------------------|----------|---|---|
|                | <i>Acratocnus odontrigonus</i>   | 4.518514 | 0 |   |
|                | <i>Parconus serus</i>            | 4.845098 | 0 |   |
|                | <i>Synconus comes</i>            | 3.778151 | 0 |   |
|                | <i>Meizonyx salvadorensis</i>    | 5.778151 | 0 |   |
| Megatheriidae  | <i>Eremotherium rusconii</i>     | 6.477121 | 0 | 0 |
|                | <i>Nothrotheriops shastensis</i> | 5.477121 | 0 | 0 |
|                | <i>Megatherium</i>               | 6.60206  | 0 |   |
|                | <i>Nothrotherium</i>             | .        | 0 |   |
| Myodontidae    | <i>Glossotherium harlani</i>     | 5.778151 | 0 | 0 |
|                | <i>Lestodon</i>                  | .        | 0 |   |
|                | <i>Myodon</i>                    | .        | 0 |   |
|                | <i>Scelidotherium</i>            | 5.778151 | 0 |   |
| Dasypodidae    | <i>Holmesina septentrionalis</i> | 5.494155 | 0 |   |
|                | <i>Pampatherium</i>              | .        | 0 |   |
|                | <i>Dasypus bellus</i>            | 4.653213 | 0 |   |
|                | <i>Kraglievichia floridanus</i>  | 4.653213 | 0 |   |
|                | <i>Eutatus</i>                   | .        | 0 |   |
|                | <i>Propraopus</i>                | .        | 0 |   |
| Glyptodontidae | <i>Glyptodon</i>                 | .        | 0 |   |
|                | <i>Glyptotherium floridanum</i>  | 6        | 0 | 1 |

---



**Table S3. Extant species from the study regions with reproductive rates less than 0.97 offspring per year, and which should therefore have been at high risk during the ‘megafauna’ extinctions of the late Quaternary**

| Family          | Genus        | species          | log 10<br>mass<br>(gm) | reproductive<br>rate | arboreal 1,<br>terrestrial<br>0 | habitat<br>open 0,<br>closed 1 | nocturnal 1,<br>diurnal 0 | alpine 1 | high<br>latitude 1 |
|-----------------|--------------|------------------|------------------------|----------------------|---------------------------------|--------------------------------|---------------------------|----------|--------------------|
| Camelidae       | Lama         | guanicoe         | 5.04                   | 0.5                  | 0                               | 0                              | 0                         | 1        | 0                  |
|                 | Vicuna       | vicugna          | 4.7                    | 0.67                 | 0                               | 0                              | 0                         | 1        | 0                  |
| Ursidae         | Ursus        | arctos           | 5.6                    | 0.86                 | 0                               | 0                              | 0                         | 0        | 1                  |
|                 | Ursus        | maritimus        | 5.59                   | 0.67                 | 0                               | 0                              | 0                         | 0        | 1                  |
| Felidae         | Panthera     | onca             | 5.00                   | 0.96                 | 0                               | 1                              | 0                         | 0        | 0                  |
| Bovidae         | Bison        | bonasus          | 5.95                   | 0.57                 | 0                               | 0                              | 0                         | 0        | 0                  |
|                 | Bison        | bison            | 5.8                    | 0.81                 | 0                               | 0                              | 0                         | 0        | 0                  |
|                 | Ovibos       | moschatus        | 5.49                   | 0.62                 | 0                               | 0                              | 0                         | 0        | 1                  |
|                 | Capra        | ibex             | 4.96                   | 0.86                 | 0                               | 1                              | 0                         | 1        | 0                  |
| Lemurs          | Indri        | indri            | 3.83                   | 0.4                  | 1                               | 1                              | 0                         | 0        | 0                  |
|                 | Daubentonia  | madagascariensis | 3.41                   | 0.4                  | 1                               | 1                              | 1                         | 0        | 0                  |
| Macropodidae    | Dendrolagus  | lumholtzi        | 3.83                   | 0.84                 | 1                               | 1                              | 1                         | 0        | 0                  |
|                 | Dendrolagus  | matschiei        | 3.96                   | 0.89                 | 1                               | 1                              | 1                         | 0        | 0                  |
| Tachyglossidae  | Tachyglossus | aculeatus        | 3.65                   | 0.5                  | 0                               | 0                              | 0                         | 0        | 0                  |
| Choloepidae     | Choleopus    | didactylus       | 3.79                   | 0.6                  | 1                               | 1                              | 1                         | 0        | 0                  |
|                 | Choleopus    | hoffmanni        | 3.76                   | 0.8                  | 1                               | 1                              | 1                         | 1        | 0                  |
| Vombatidae      | Lasiorhinus  | krefftii         | 4.49                   | 0.65                 | 0                               | 1                              | 1                         | 0        | 0                  |
|                 | Vombatus     | ursinus          | 4.41                   | 0.5                  | 0                               | 1                              | 1                         | 0        | 0                  |
| Petauridae      | Petaurus     | australis        | 2.76                   | 0.83                 | 1                               | 1                              | 1                         | 0        | 0                  |
| Pseudocheiridae | Petauroides  | volans           | 3.11                   | 0.82                 | 1                               | 1                              | 1                         | 0        | 0                  |
| Tapiridae       | Tapirus      | bairdii          | 5.3                    | 0.7                  | 0                               | 1                              | 1                         | 0        | 0                  |
|                 | T.           | terrestris       | 5.18                   | 0.7                  | 0                               | 1                              | 1                         | 0        | 0                  |
|                 | T.           | pinchaque        | 5.18                   | 0.7                  | 0                               | 1                              | 1                         | 0        | 0                  |
| Cebidae         | Allouatta    | palliata         | 3.78                   | 0.53                 | 1                               | 1                              | 0                         | 0        | 0                  |
|                 | Ateles       | geoffroyi        | 3.9                    | 0.38                 | 1                               | 1                              | 0                         | 0        | 0                  |
|                 | Ateles       | paniscus         | 3.94                   | 0.3                  | 1                               | 1                              | 0                         | 0        | 0                  |
|                 | Brachyteles  | arachnoides      | 4.03                   | 0.5                  | 1                               | 1                              | 0                         | 0        | 0                  |
|                 | Cacajao      | calvus           | 3.51                   | 0.5                  | 1                               | 1                              | 0                         | 0        | 0                  |
| Erethizontidae  | Coendou      | prehensilis      | 3.7                    | 0.84                 | 1                               | 1                              | 1                         | 0        | 0                  |
